# Supplementary material
Source: PubMed Central journal article supplement (PMC10352931)
Supplement: jama-e2313239-s004.pdf [file jama-e2313239-s004.pdf]

**\*Group Name(s): TRAILBLAZER-ALZ 2 Investigators**

| <b>*First Name and Middle Initial(s)</b> | <b>*Last Name</b> | <b>*Suffix (eg, Jr, III)</b> | <b>Academic Degrees</b> | <b>Institution</b>                    | <b>Location (city)</b> | <b>Location (state/province)</b> | <b>Location (country)</b> | <b>Role or Contribution, eg, chair, principal investigator</b> |
|------------------------------------------|-------------------|------------------------------|-------------------------|---------------------------------------|------------------------|----------------------------------|---------------------------|----------------------------------------------------------------|
| Rafael                                   | Abreu             |                              | MD                      | Goji Group - Research Trials Group    | Miami Lakes            | FL                               | United States             | Site Investigator                                              |
| Pinky                                    | Agarwal           |                              | MD                      | Evergreen Health Medical Center       | Kirkland               | WA                               | United States             | Site Investigator                                              |
| Puja                                     | Aggarwal          |                              | MD (2022-2022)          | Synexus Clinical Research US          | Orlando                | FL                               | United States             | Site Investigator                                              |
| Marc                                     | Agronin           |                              | MD                      | Miami Jewish Health                   | Miami                  | FL                               | United States             | Site Investigator                                              |
| Alison                                   | Allen             |                              | MD                      | Mountain Neurological Research Center | Basalt                 | CO                               | United States             | Site Investigator                                              |
| Dario                                    | Altamirano        |                              | DO                      | Aga Clinical Trials                   | Hialeah                | FL                               | United States             | Site Investigator                                              |

|          |            |    |                                     |                 |         |               |                   |
|----------|------------|----|-------------------------------------|-----------------|---------|---------------|-------------------|
| Gustavo  | Alva       | MD | Hoag Memorial Hospital Presbyterian | Newport Beach   | CA      | United States | Site Investigator |
| James    | Andersen   | MD | Accel Research-Lakeland Banner      | Lakeland        | FL      | United States | Site Investigator |
| Allan    | Anderson   | MD | Alzheimer Institute Anderson        | Tucson          | AZ      | United States | Site Investigator |
| Donald   | Anderson   | MD | Clinical Research Southern Illinois | Redlands        | CA      | United States | Site Investigator |
| Jennifer | Arnold     | MD | University School of Medicine       | Springfield     | IL      | United States | Site Investigator |
| Takashi  | Asada      | MD | Memory Clinic Toride                | Toride-city     | IBARAKI | Japan         | Site Investigator |
| Yasuhiro | Aso        | MD | Oita Prefectural Hospital           |                 | OITA    | Japan         | Site Investigator |
| Vikram   | Atit       | MD | Suncoast Clinical Research          | New Port Richey | FL      | United States | Site Investigator |
| Ricardo  | Ayala      | MD | Tallahassee Neurology               | Tallahassee     | FL      | United States | Site Investigator |
| Michael  | Badruddoja | MD | Center For Neurosciences            | Tucson          | AZ      | United States | Site Investigator |

|           |                 |         |                                                      |            |               |                |                   |
|-----------|-----------------|---------|------------------------------------------------------|------------|---------------|----------------|-------------------|
| Hanna     | Badzio-jagiello | MD      | Centrum<br>Badan<br>Klinicznych                      | dansk      | POMORSKI<br>E | Poland         | Site Investigator |
| Michal    | Bajacek         | MD, PhD | Neurologick<br>a ordinace                            | Praha      |               | Czech Republic | Site Investigator |
| David     | Barton          | MD, PhD | Neurocentri<br>x<br>Emerald                          | Carlton    | VICTORIA      | Australia      | Site Investigator |
| David     | Bear            | DO      | Coast<br>Neurology<br>Universal<br>Research<br>Group | Pensacola  | FL            | United States  | Site Investigator |
| Sabrina   | Benjamin        | MD      |                                                      | Tacoma     | WA            | United States  | Site Investigator |
| Richard   | Bergeron        | MD, PhD | Clinique De<br>La Mémoire<br>De<br>L'outaouais       | Gatineau   | QUEBEC        | Canada         | Site Investigator |
| Perminder | Bhatia          | MD      | Neuro-pain<br>Medical<br>Center                      | Fresno     | CA            | United States  | Site Investigator |
| Sandra    | Black           | MD      | Sunnybrook<br>Research<br>Institute                  | Toronto    | ONTARIO       | Canada         | Site Investigator |
| Allan     | Block           | MD      | Perseveranc<br>e Research<br>Center                  | Scottsdale | AZ            | United States  | Site Investigator |

|          |              |                       |                                                         |              |                       |               |                   |
|----------|--------------|-----------------------|---------------------------------------------------------|--------------|-----------------------|---------------|-------------------|
| Mohammad | Bolouri      | MD                    | AMC<br>Research<br>LLC<br>Neuropsych<br>iatric          | Matthews     | NC                    | United States | Site Investigator |
| Wendy    | Bond         | MD                    | Research<br>Center of<br>Southwest<br>Florida<br>Ottawa | Fort Myers   | FL                    | United States | Site Investigator |
| Jean     | Bouthillier  | MD                    | Memory<br>Clinic<br>Sunny                               | Ottawa       | ONTARIO               | Canada        | Site Investigator |
| Sharon   | Brangman     | MD                    | Upstate<br>Medical<br>University                        | Syracuse     | NY                    | United States | Site Investigator |
| Bruce    | Brew         | MD                    | St Vincent's<br>Hospital                                | Sydney       | NEW<br>SOUTH<br>WALES | Australia     | Site Investigator |
| Sarah    | Brisbin      | MD (2022-<br>current) | Kawartha<br>Centre -<br>Redefining<br>Healthy<br>Aging  | Peterborough | ONTARIO               | Canada        | Site Investigator |
| Toby     | Briskin      | MD (2021-<br>2022)    | Velocity<br>Clinical<br>Research                        | Cleveland    | OH                    | United States | Site Investigator |
| Amy      | Brodman<br>n | MD, PhD               | The Royal<br>Melbourne<br>Hospital                      | Parkville    | VICTORIA              | Australia     | Site Investigator |
| Mark     | Brody        | MD (2020-<br>2022)    | Brain<br>Matters<br>Research                            | Delray Beach | FL                    | United States | Site Investigator |

|         |            |                |                                                                 |                   |    |               |                   |
|---------|------------|----------------|-----------------------------------------------------------------|-------------------|----|---------------|-------------------|
| Mark    | Brody      | MD (2020-2022) | Brain Matters Research Indiana                                  | Stuart            | FL | United States | Site Investigator |
| Jared   | Brosch     | MD, PhD        | University School Of Medicine                                   | Indianapolis      | IN | United States | Site Investigator |
| Celia   | Brown      | MD             | Clinical Research Institute Llc                                 | Los Angeles       | CA | United States | Site Investigator |
| Paul    | Brownstone | MD             | Alpine Clinical Research Center                                 | Boulder           | CO | United States | Site Investigator |
| Sylwia  | Bukowczan  | MD, PhD        | Diamond ClinicUI. University Of Kansas Medical Center Neurology | Krakow            |    | Poland        | Site Investigator |
| Jeffrey | Burns      | MD             | Of Central Florida Research Center Dent Neurologic Institute    | Fairway           | KS | United States | Site Investigator |
| Alicia  | Cabrera    | MD             | Of Central Florida Research Center Dent Neurologic Institute    | Altamonte Springs | FL | United States | Site Investigator |
| Horace  | Capote     | MD             | Of Central Florida Research Center Dent Neurologic Institute    | Amherst           | NY | United States | Site Investigator |
| Angel   | Carrasco   | MD             | Homestead Associates In Research                                | Miami             | FL | United States | Site Investigator |

|         |                      |         |                                                              |                 |         |               |                   |
|---------|----------------------|---------|--------------------------------------------------------------|-----------------|---------|---------------|-------------------|
| Jose    | Cevallos Yopez       | MD      | Finlay Medical Research                                      | Greenacres      | FL      | United States | Site Investigator |
| Eric    | Chavez               | MD      | Artemis Institute For Clinical Research                      | San Diego       | CA      | United States | Site Investigator |
| Howard  | Chertkow             | MD      | Baycrest Health Sciences                                     | Toronto         | ONTARIO | Canada        | Site Investigator |
| Urszula | Chyrchel-paszkiewicz | MD, PhD | Prywatny Gabinet Lekarski U.chyrchelU I. Neurology Center Of | Chodzki 3Lublin |         | Poland        | Site Investigator |
| Anthony | Ciabarra             | MD, PhD | North Orange County Mcfarland Clinic                         | Fullerton       | CA      | United States | Site Investigator |
| Edward  | Clemmons             | DO      | Sentara Norfolk General Hospital                             | Ames            | IA      | United States | Site Investigator |
| Daniel  | Cohen                | MD      | Cohen Medical Associates                                     | Norfolk         | VA      | United States | Site Investigator |
| Robert  | Cohen                | DO      | Toronto Memory Program                                       | Delray Beach    | FL      | United States | Site Investigator |
| Ian     | Cohen                | MD      |                                                              | Toronto         | ONTARIO | Canada        | Site Investigator |

|          |             |                   |                                                               |                  |                 |               |                   |
|----------|-------------|-------------------|---------------------------------------------------------------|------------------|-----------------|---------------|-------------------|
| Mauricio | Concha      | MD                | Intercoastal Medical Group Neurology Offices Of South Florida | Sarasota         | FL              | United States | Site Investigator |
| Brian    | Costell     | MD                | Central Coast Neurosciences Research                          | Boca Raton       | FL              | United States | Site Investigator |
| Denis    | Crimmins    | MD                | Inspira Clinical Research Integrity                           | Erina            | NEW SOUTH WALES | Australia     | Site Investigator |
| Yvette   | Cruz-pagan  | MD                | Clinical Research                                             | San Juan         | PR              | United States | Site Investigator |
| Adolfo   | Cueli       | MD                | Research                                                      | Doral            | FL              | United States | Site Investigator |
| Robert   | Cupelo      | MD (2021-Present) | Velocity Clinical Research Centrum                            | Syracuse         | NY              | United States | Site Investigator |
| Maciej   | Czarnecki   | MD                | Medyczne Neuroprotect                                         | Warszawa         |                 | Poland        | Site Investigator |
| David    | Darby       | PhD               | The Alfred Hospital Brain Research Center                     | Melbourne        | VICTORIA        | Australia     | Site Investigator |
| P.l.j.   | Dautzenberg | MD                | Center Statenlaan                                             | 's-Hertogenbosch |                 | Netherlands   | Site Investigator |

|         |                  |                    |                                                                     |                  |    |               |                   |
|---------|------------------|--------------------|---------------------------------------------------------------------|------------------|----|---------------|-------------------|
| Peter   | De Deyn          | MD                 | QPS<br>Netherlands<br>B.V Henri<br>Dunantweg<br>6                   | Leeuwarden       |    | Netherlands   | Site Investigator |
| Jose    | De La<br>Gandara | MD                 | Quantum<br>Laboratorie<br>s Inc -<br>Pompano<br>Beach               | Pompano<br>Beach | FL | United States | Site Investigator |
| Kenneth | Deck             | MD (2021-<br>2022) | Tilda<br>Research -<br>Hq                                           | Tustin           | CA | United States | Site Investigator |
| David   | Dibenedet<br>to  | MD                 | Medvadis<br>Research<br>Corporation                                 | Waltham          | MA | United States | Site Investigator |
| Mark    | Dibuono          | MD                 | Richmond<br>Behavioral<br>Associates<br>Maine<br>Medical<br>Center- | Staten Island    | NY | United States | Site Investigator |
| Eric    | Dinnerstei<br>n  | MD                 | Maine<br>Medical<br>Partners<br>Neurology                           | Scarborough      | ME | United States | Site Investigator |
| Ahmet   | Dirican          | MD                 | Btc Network                                                         | New Bedford      | MA | United States | Site Investigator |
| Shanker | Dixit            | MD (2021-<br>2022) | Las Vegas<br>Medical<br>Research                                    | Las Vegas        | NV | United States | Site Investigator |



|        |              |    |                                                   |                  |           |               |                   |
|--------|--------------|----|---------------------------------------------------|------------------|-----------|---------------|-------------------|
| Jacek  | Dobryniewski | MD | Podlaskie Centrum Psychogeriatricii               | Białystok        | PODLASKIE | Poland        | Site Investigator |
| Ryan   | Drake        | DO | NeuroScience Research Center                      | Canton           | OH        | United States | Site Investigator |
| Peter  | Drysdale     | MD | Delmont Consulting Suites                         | Iris             | VICTORIA  | Australia     | Site Investigator |
| Ranjan | Duara        | MD | Mount Sinai Cancer Center                         | Miami Beach      | FL        | United States | Site Investigator |
| John   | Duffy        | MD | Syrentis Clinical Research                        | Santa Ana        | CA        | United States | Site Investigator |
| Aaron  | Ellenbogen   | DO | Quest Research Institute                          | Farmington Hills | MI        | United States | Site Investigator |
| Victor | Faradji      | MD |                                                   | Miami            | FL        | United States | Site Investigator |
| Marc   | Feinberg     | MD | Sfm Research (south Florida Neurology Associates) | Boca Raton       | FL        | United States | Site Investigator |
| Robert | Feldman      | MD | Senior Clinical Trials                            | Laguna Hills     | CA        | United States | Site Investigator |

|          |            |         |                                                   |                      |         |               |                   |
|----------|------------|---------|---------------------------------------------------|----------------------|---------|---------------|-------------------|
| Simon    | Fishman    | MD      | Integrated<br>Neurology<br>Services               | Arlington            | VA      | United States | Site Investigator |
| Stephen  | Flitman    | MD      | Xenoscience                                       | Phoenix              | AZ      | United States | Site Investigator |
| Concetta | Forchetti  | MD, PhD | Alexian<br>Brothers<br>Medical<br>Center          | Elk Grove<br>Village | IL      | United States | Site Investigator |
| Ivonne   | Fraga      | MD      | Instituto De<br>Neurologia                        | San Juan             | PR      | United States | Site Investigator |
| Andrew   | Frank      | MD      | Elizabeth<br>Bruyere<br>Health<br>Centre<br>North | Ottawa               | ONTARIO | Canada        | Site Investigator |
| Benjamin | Frishberg  | MD      | County<br>Neurology<br>Associates                 | Carlsbad             | CA      | United States | Site Investigator |
| Hiroto   | Fujigasaki | MD      | Tokyo<br>Metro<br>Bokutoh<br>Hospital<br>Clinical | Sumida-ku            | TOKYO   | Japan         | Site Investigator |
| Hiroyuki | Fukase     | MD      | Research<br>Hospital<br>Tokyo                     | Shinjuku-ku          | TOKYO   | Japan         | Site Investigator |
| Ileana   | Fumero     | MD      | Barbara<br>Diaz-<br>hernandez<br>MD<br>Research   | San Juan             | PR      | United States | Site Investigator |

|             |           |         |                                                                 |              |        |               |                   |
|-------------|-----------|---------|-----------------------------------------------------------------|--------------|--------|---------------|-------------------|
| Kenichi     | Furihata  | MD, PhD | P-one Clinic                                                    | Hachioji     | TOKYO  | Japan         | Site Investigator |
| Christopher | Galloway  | MD      | Headlands<br>Research<br>Orlando                                | Orlando      | FL     | United States | Site Investigator |
| Rekha       | Gandhi    | MD      | Conquest<br>Research                                            | Winter Park  | FL     | United States | Site Investigator |
| Kristi      | George    | MD      | Josephson<br>Wallack<br>Munshower<br>Neurology                  | Indianapolis | IN     | United States | Site Investigator |
| Marcel      | Germain   | MD      | Diex<br>Recherche<br>Sherbrooke<br>Inc.<br>Advocate             | Sherbrooke   | QUEBEC | Canada        | Site Investigator |
| Darren      | Gitelman  | MD      | Lutheran<br>General<br>Hospital                                 | Park Ridge   | IL     | United States | Site Investigator |
| Nicholas    | Goetsch   | DO      | Mercyone<br>Northeast<br>Iowa Family<br>Medicine &<br>Residency | Waterloo     | IA     | United States | Site Investigator |
| Danielle    | Goldfarb  | MD      | Banner Sun<br>Health<br>Research<br>Institute                   | Sun City     | AZ     | United States | Site Investigator |
| Mark        | Goldstein | MD      | Jem<br>Research<br>Institute                                    | Atlantis     | FL     | United States | Site Investigator |

|          |                |                  |                                             |               |         |               |                   |
|----------|----------------|------------------|---------------------------------------------|---------------|---------|---------------|-------------------|
| Lawrence | Goldstick      | MD               | University Of Cincinnati Physicians Company | Dayton        | OH      | United States | Site Investigator |
| Yaneicy  | Gonzalez Rojas | MD               | Optimus U                                   | Miami         | FL      | United States | Site Investigator |
| Ira      | Goodman        | MD (2020-2022)   | Synexus Clinical Research US                | Orlando       | FL      | United States | Site Investigator |
| David    | Greeley        | MD               | Kingfisher Cooperative                      | Spokane       | WA      | United States | Site Investigator |
| Carl     | Griffin        | MD               | Lynn Health Science Institute               | Oklahoma City | OK      | United States | Site Investigator |
| Eric     | Grigsby        | MD               | Neurovations                                | Napa          | CA      | United States | Site Investigator |
| Daniel   | Grosz          | MD               | Pharmacology Research Institute             | Encino        | CA      | United States | Site Investigator |
| Karl     | Hafner         | MD (2021 - 2021) | Velocity Clinical Research Albany           | Syracuse      | NY      | United States | Site Investigator |
| David    | Hart           | MD               | Medical College Skds                        | Albany        | NY      | United States | Site Investigator |
| Sam      | Henein         | MD               | Research Inc.                               | Newmarket     | ONTARIO | Canada        | Site Investigator |

|          |            |    |                                                                                |                   |                 |               |                   |
|----------|------------|----|--------------------------------------------------------------------------------|-------------------|-----------------|---------------|-------------------|
| Brad     | Herskowitz | MD | Brainstorm Research                                                            | Miami             | FL              | United States | Site Investigator |
| Shinji   | Higashi    | MD | Tokyo Medical University Ibaraki Medical Center Himeji Central Hospital Clinic | Inashiki          | IBARAKI         | Japan         | Site Investigator |
| Yasuto   | Higashi    | MD | PCND Neuroscience Research Institute                                           | Himeji            | HYOGO           | Japan         | Site Investigator |
| Gilbert  | Ho         | MD | Gilbert Neurology                                                              | Poway             | CA              | United States | Site Investigator |
| Jonathan | Hodgson    | DO | Hammondcare                                                                    | Gilbert           | AZ              | United States | Site Investigator |
| Mark     | Hohenberg  | MD | North Kansas City Hospital                                                     | Sydney            | NEW SOUTH WALES | Australia     | Site Investigator |
| Larry    | Hollenbeck | MD | Neurological Associates Albany                                                 | North Kansas City | MO              | United States | Site Investigator |
| Richard  | Holub      | MD |                                                                                | Albany            | NY              | United States | Site Investigator |

|             |          |                |                                                        |               |             |                |                   |
|-------------|----------|----------------|--------------------------------------------------------|---------------|-------------|----------------|-------------------|
| Tomokatsu   | Hori     | MD             | Moriyama Neuro Center Hospital                         | Edogawa-ku    | TOKYO       | Japan          | Site Investigator |
| Jakub       | Hort     | MD, PhD        | Neuropsychiatrie s.r.o                                 | Praha         |             | Czech Republic | Site Investigator |
| Jan         | Ilkowski | MD             | Nzoz Neuro - KardUI                                    | Poznan        |             | Poland         | Site Investigator |
| K. Jennifer | Ingram   | MD (2020-2022) | Kawartha Centre - Redefining Healthy Aging Acellacare- | Peterborough  | ONTARIO     | Canada         | Site Investigator |
| Mitchell    | Isaac    | MD             | Winston-Salem                                          | Winston-Salem | NC          | United States  | Site Investigator |
| Mitsunori   | Ishikawa | MD             | Ishikawa Clinic                                        | Kyoto         | KYOTO       | Japan          | Site Investigator |
| Lubos       | Janu     | MD, PhD        | A-shine Sumavska                                       | Plzen         |             | Czech Republic | Site Investigator |
| Mark        | Johnston | MD             | True North Clinical Research Halifax                   | Halifax       | NOVA SCOTIA | Canada         | Site Investigator |
| Mark        | Johnston | MD             | Centricity Research – New Minas                        | New Minas     | NOVA SCOTIA | Canada         | Site Investigator |
| William     | Julio    | MD             | SCB Research Center                                    | Bayamon       | PR          | United States  | Site Investigator |

|           |                |                       |                                                                           |               |           |               |                   |
|-----------|----------------|-----------------------|---------------------------------------------------------------------------|---------------|-----------|---------------|-------------------|
| William   | Justiz         | MD                    | Collier<br>Neurologic<br>Specialists                                      | Naples        | FL        | United States | Site Investigator |
| Tomotsugu | Kaga           | MD (2022-<br>current) | Nagoya<br>Ekisaikai<br>Hospital                                           | Nagoya-shi    | AICHI-KEN | Japan         | Site Investigator |
| Tatsuya   | Kakigi         | MD                    | Kakigi Clinic                                                             | Kobe          | HYOGO     | Japan         | Site Investigator |
| Marvin    | Kalafer        | MD                    | The Clinical<br>Trial Center                                              | Jenkintown    | PA        | United States | Site Investigator |
| Mikiko    | Kamijo         | MD                    | Chubu-rosai<br>Hospital                                                   | Nagoya        | AICHI     | Japan         | Site Investigator |
| Jeffrey   | Kaplan         | MD                    | College Park<br>Family Care<br>Center/mult<br>i Specialty<br>Clinical Res | Overland Park | KS        | United States | Site Investigator |
| Michael   | Karathano<br>s | MD                    | Central<br>States<br>Research                                             | Tulsa         | OK        | United States | Site Investigator |
| Sadao     | Katayama       | MD                    | Katayama<br>Medical<br>Clinic                                             | Kurashiki     | OKAYAMA   | Japan         | Site Investigator |

|           |           |                   |                                            |                |         |               |                   |
|-----------|-----------|-------------------|--------------------------------------------|----------------|---------|---------------|-------------------|
| Siddharth | Kaul      | MD                | Clinical Research Professionals            | Chesterfield   | MO      | United States | Site Investigator |
| Andrew    | Keegan    | MD (2020-2022)    | Roskamp Institute Clinical Trials Division | Sarasota       | FL      | United States | Site Investigator |
| Diana     | Kerwin    | MD                | Kerwin Research Center                     | Dallas         | TX      | United States | Site Investigator |
| Uzma      | Khan      | MD (2022-current) | Synexus Clinical Research Us               | The Villages   | FL      | United States | Site Investigator |
| Arifulla  | Khan      | MD                | Northwest Clinical Research Center         | Bellevue       | WA      | United States | Site Investigator |
| Noriyuki  | Kimura    | MD, PhD           | Oita University Hospital                   | Yufu           | OITA    | Japan         | Site Investigator |
| Gregory   | Kirk      | MD                | Merritt Island Medical Research            | Merritt Island | FL      | United States | Site Investigator |
| Gabriela  | Klodowska | MD, PhD           | Klinika Neuro-careUI.                      | Slaskie        | ŚLĄSKIE | Poland        | Site Investigator |
| Hisatomo  | Kowa      | MD                | Kobe University Hospital                   | Chuo-ku Kobe   | HYOGO   | Japan         | Site Investigator |



|          |          |                |                                          |                  |                   |               |                   |
|----------|----------|----------------|------------------------------------------|------------------|-------------------|---------------|-------------------|
| Christen | Kutz     | PA             | Colorado Springs Neurological Associates | Colorado Springs | CO                | United States | Site Investigator |
| Joseph   | Kwentus  | MD             | Precise Research Centers                 | Flowood          | MS                | United States | Site Investigator |
| Rosalyn  | Lai      | MD             | Kara Institute Of Neurological Diseases  | Macquarie Park   | NEW SOUTH WALES   | Australia     | Site Investigator |
| Ayesha   | Lall     | MD (2021-2022) | Synexus Clinical Research Us             | The Villages     | FL                | United States | Site Investigator |
| Mary     | Lawrence | MD             | Carteret Medical Group Irvine            | Morehead City    | NC                | United States | Site Investigator |
| Elly     | Lee      | MD             | Clinical Research Center                 | Irvine           | CA                | United States | Site Investigator |
| Ramon    | Leon     | MD             | Imic Health                              | Miami            | FL                | United States | Site Investigator |
| Gary     | Linker   | MD             | Initiatives Research                     | Fayetteville     | AR                | United States | Site Investigator |
| Pawel    | Lisewski | MD             | Centrum Medyczne NeuromedUlica           | Bydgoszcz        | KUJAWSKO-POMORSKI | Poland        | Site Investigator |

|           |            |         |                                             |            |                  |                   |                   |
|-----------|------------|---------|---------------------------------------------|------------|------------------|-------------------|-------------------|
| Jonathan  | Liss       | MD      | Columbus<br>Memory<br>Center                | Columbus   | GA               | United States     | Site Investigator |
| Collins   | Liu        | MD      | Kaizen Brain<br>Center                      | La Jolla   | CA               | United States     | Site Investigator |
| Scott     | Losk       | PhD     | Summit<br>Research<br>Network Inc           | Portland   | OR               | United States     | Site Investigator |
| Ewelina   | Lukaszuk   | MD, PhD | Klimed                                      | Bialystok  |                  | Poland            | Site Investigator |
| Jennifer  | Lynch      | MD      | Glasgow<br>Memory<br>Clinic Excel<br>House  | Motherwell | GREAT<br>BRITAIN | United<br>Kingdom | Site Investigator |
| Stephen   | Macfarlane | MD      | Hammondcare                                 | Malvern    | VICTORIA         | Australia         | Site Investigator |
| Josephine | Macswiney  | MD      | Re:cognition<br>Health -<br>Birmingham      | Birmingham | BIRMINGHAM       | United<br>Kingdom | Site Investigator |
| Josephine | Macswiney  | MD      | Re:cognition<br>Health -<br>London          | LONDON     |                  | United<br>Kingdom | Site Investigator |
| Nicholas  | Manning    | MD      | Re:cognition<br>Health<br>Clinics<br>s.r.o. | Guildford  | SURREY           | United<br>Kingdom | Site Investigator |
| Oto       | Markovic   | MD      |                                             | Hostivice  |                  | Czech Republic    | Site Investigator |
| Donald    | Marks      | MD      |                                             | Plymouth   | MA               | United States     | Site Investigator |
| Joseph    | Masdeu     | MD      | Houston<br>Methodist<br>Research            | Houston    | TX               | United States     | Site Investigator |

|          |            |    |                                             |              |       |               |                   |
|----------|------------|----|---------------------------------------------|--------------|-------|---------------|-------------------|
| Yutaka   | Matsui     | MD | Matsui E-clinic<br>Kobe City Medical Center | Akashi-shi   | HYOGO | Japan         | Site Investigator |
| Kunitaka | Matsuishi  | MD | General Hospital                            | Chuo-ku Kobe | HYOGO | Japan         | Site Investigator |
| Peter    | Mcallister | MD | New England Institute For Clinical Research | Stamford     | CT    | United States | Site Investigator |
| Brock    | Mcconnehey | DO | Northwest Clinical Trials Prism Health      | Boise        | ID    | United States | Site Investigator |
| Alvin    | Mcelveen   | MD | Richland Department Of Neurology Research   | Columbia     | SC    | United States | Site Investigator |
| Lora     | Mcgill     | MD | Clinical Neuroscience Solutions PA          | Memphis      | TN    | United States | Site Investigator |
| Adam     | Mecca      | MD | Yale University School of Medicine          | New Haven    | CT    | United States | Site Investigator |

|          |                  |                     |                                                                |            |                |               |                   |
|----------|------------------|---------------------|----------------------------------------------------------------|------------|----------------|---------------|-------------------|
| Michael  | Mega             | MD, PhD             | Center For<br>Cognitive<br>Health                              | Portland   | OR             | United States | Site Investigator |
| Jason    | Mensah           | MD                  | Gadolin<br>Research                                            | Beaumont   | TX             | United States | Site Investigator |
| Anatol   | Mickielew<br>icz | MD                  | Centrum<br>Medyczne<br>AmedUl.<br>Sc3                          | Warszawa   | MAZOWIEC<br>KI | Poland        | Site Investigator |
| Artin    | Minaeian         | MD                  | Research<br>Group Inc                                          | Pasadena   | CA             | United States | Site Investigator |
| Bharat   | Mocherla         | MD                  | Las Vegas<br>Medical<br>Research                               | Las Vegas  | NV             | United States | Site Investigator |
| Cynthia  | Murphy           | PsyD                | The<br>Memory<br>Clinic                                        | Bennington | VT             | United States | Site Investigator |
| Paul     | Murphy           | MD                  | Ascension<br>Via Christi<br>Research<br>Medical<br>Corporation | Wichita    | KS             | United States | Site Investigator |
| HirotaKa | Nagashim<br>a    | PhD (2021-<br>2022) | Chiseikai<br>Tokyo<br>Center<br>Clinic                         | Chuo-ku    | TOKYO          | Japan         | Site Investigator |
| Anil     | Nair             | MD (2020-<br>2020)  | Alzheimer's<br>Disease<br>Center                               | Quincy     | MA             | United States | Site Investigator |
| Malini   | Nair             | MD (2020-<br>2021)  | Alzheimer's<br>Disease<br>Center                               | Quincy     | MA             | United States | Site Investigator |

|           |            |                |                                         |                 |                  |               |                   |
|-----------|------------|----------------|-----------------------------------------|-----------------|------------------|---------------|-------------------|
| John      | Nardandrea | MD             | Renstar Medical Research                | Ocala           | FL               | United States | Site Investigator |
| Marshall  | Nash       | MD             | ARS-Neurostudies                        | Decatur         | GA               | United States | Site Investigator |
| Ziad      | Nasreddine | MD             | Moca Research And Innovation Inc.       | Greenfield Park | QUEBEC           | Canada        | Site Investigator |
| Yoshihiko | Nishida    | MD             | Itsuki Hospital                         | Tokushima       | TOKUSHIMA        | Japan         | Site Investigator |
| Jeffrey   | Norton     | MD             | Charter Research New                    | Lady Lake       | FL               | United States | Site Investigator |
| Lazaro    | Nunez      | MD             | Horizon Research                        | Miami           | FL               | United States | Site Investigator |
| Jun       | Ochiai     | MD (2021-2022) | Nagoya Ekisaikai Hospital               | Nagoya-shi      | AICHI-KEN        | Japan         | Site Investigator |
| Takuya    | Ohkubo     | MD             | Yokohama City Minato Red Cross Hospital | Yokohama-shi    | KANAGAWA         | Japan         | Site Investigator |
| Yasuyuki  | Okamura    | MD             | Makita General Hospital                 | Ota-ku          | TOKYO            | Japan         | Site Investigator |
| Eugene    | Okorie     | MD             | Oct Research Ulc                        | Kelowna         | BRITISH COLUMBIA | Canada        | Site Investigator |
| Esteban   | Olivera    | MD             | Clincloud                               | Maitland        | FL               | United States | Site Investigator |

|           |            |                   |                                                 |              |         |               |                   |
|-----------|------------|-------------------|-------------------------------------------------|--------------|---------|---------------|-------------------|
| John      | O'mahony   | MD                | Bluewater Clinical Research Group Inc.          | Sarnia       | ONTARIO | Canada        | Site Investigator |
| Omid      | Omidvar    | MD                | Collaborative Neuroscience Research             | Long Beach   | CA      | United States | Site Investigator |
| Desiree   | Ortiz-Cruz | MD (2021-2022)    | Ezy Medical Research                            | Miami        | FL      | United States | Site Investigator |
| Alexander | Osowa      | MD                | Gwinnett Research Institute                     | Buford       | GA      | United States | Site Investigator |
| Michelle  | Papka      | PhD               | The Cognitive and Research Center of New Jersey | Springfield  | NJ      | United States | Site Investigator |
| Alicia    | Parker     | MD                | Glenn Biggs Institute                           | San Antonio  | TX      | United States | Site Investigator |
| Paayal    | Patel      | MD (2022-current) | Brain Matters Research                          | Delray Beach | FL      | United States | Site Investigator |
| Paayal    | Patel      | MD (2022-current) | Brain Matters Research                          | Stuart       | FL      | United States | Site Investigator |
| Ashok     | Patel      | MD                | Bio Behavioral Health                           | Toms River   | NJ      | United States | Site Investigator |

|           |                   |    |                                            |             |        |               |                   |
|-----------|-------------------|----|--------------------------------------------|-------------|--------|---------------|-------------------|
| Meenakshi | Patel             | MD | Valley Medical Primary Care                | Centerville | OH     | United States | Site Investigator |
| Claude    | Patry             | MD | Alpha Recherche Clinique                   | Quebec      | QUEBEC | Canada        | Site Investigator |
| Elizabeth | Peckham           | DO | Central Texas Neurology Consultants        | Round Rock  | TX     | United States | Site Investigator |
| Michael   | Pfeffer           | MD | Allied Biomedical Research Institute       | Miami       | FL     | United States | Site Investigator |
| Alison    | Pietras           | MD | Brigham And Women's Hospital               | Boston      | MA     | United States | Site Investigator |
| Michael   | Plopper           | MD | Sharp Mesa Vista Hospital                  | San Diego   | CA     | United States | Site Investigator |
| Anton     | Porsteinsson      | MD | University Of Rochester School of Medicine | Rochester   | NY     | United States | Site Investigator |
| Raphael   | Poulin Robitaille | MD | Alpha Recherche Clinique Lebourgneuf       | Quebec City | QUEBEC | Canada        | Site Investigator |

|          |                 |                   |                                                |               |                     |               |                   |
|----------|-----------------|-------------------|------------------------------------------------|---------------|---------------------|---------------|-------------------|
| Niels    | Prins           | MD, PhD           | Brain Research Center Zwolle                   | Zwolle        |                     | Netherlands   | Site Investigator |
| Orlando  | Puente          | MD                | Miami Dade Medical Research Institute          | Miami         | FL                  | United States | Site Investigator |
| Marcin   | Ratajczak       | MD, PhD           | Centrum Medyczne Euromedis                     | Szczecin      | ZACHODNI OPOMORSKIE | Poland        | Site Investigator |
| Margaret | Rhee            | MD (2022-Current) | Velocity Clinical Research Center For Advanced | Cleveland     | OH                  | United States | Site Investigator |
| Angela   | Ritter          | MD                | Research and Education                         | Gainesville   | GA                  | United States | Site Investigator |
| Ramon    | Rodriguez       | MD                | Charter Research                               | Winter Park   | FL                  | United States | Site Investigator |
| Lilia    | Rodriguez Ables | MD                | Finlay Medical Research                        | Miami         | FL                  | United States | Site Investigator |
| Julio    | Rojas           | MD, PhD           | University of California San Francisco         | San Francisco | CA                  | United States | Site Investigator |



|              |            |                       |                                                     |                     |        |               |                   |
|--------------|------------|-----------------------|-----------------------------------------------------|---------------------|--------|---------------|-------------------|
| Jeffrey      | Ross       | MD                    | Great Lakes<br>Clinical<br>Trials-<br>Andersonville | Chicago             | IL     | United States | Site Investigator |
| Paule        | Royer      | MD                    | Q&T<br>Research<br>Sherbrooke<br>Inc.               | Sherbrooke          | QUEBEC | Canada        | Site Investigator |
| Jay          | Rubin      | MD (2020 -<br>2021)   | Synexus<br>Clinical<br>Research Us                  | The Villages        | FL     | United States | Site Investigator |
| David        | Russell    | MD                    | Institute For<br>Neurodegen<br>erative<br>Disorders | New Haven           | CT     | United States | Site Investigator |
| Sterre Malou | Rutgers    | MD                    | Brain<br>Research<br>Center<br>Cronenburg<br>2      | Amsterdam           |        | Netherlands   | Site Investigator |
| Stephanie    | Rutrick    | MD (2022-<br>Current) | Adams<br>Clinical<br>NYU                            | Watertown           | MA     | United States | Site Investigator |
| Martin       | Sadowski   | MD, PhD               | Langone<br>Health<br>Velocity<br>Clinical           | New York            | NY     | United States | Site Investigator |
| Beth         | Safirstein | MD                    | Research-<br>Hallandale<br>Beach                    | Hallandale<br>Beach | FL     | United States | Site Investigator |

|          |              |    |                                                                 |             |       |               |                   |
|----------|--------------|----|-----------------------------------------------------------------|-------------|-------|---------------|-------------------|
| Takafumi | Sagisaka     | MD | Kojunkai<br>Daido Clinic                                        | Nagoya      | AICHI | Japan         | Site Investigator |
| Douglas  | Scharre      | MD | Ohio State<br>University<br>Medical<br>Center                   | Columbus    | OH    | United States | Site Investigator |
| Lon      | Schneider    | MD | USC Keck<br>School Of<br>Medicine                               | Los Angeles | CA    | United States | Site Investigator |
| Curtis   | Schreiber    | MD | Missouri<br>Memory<br>Center<br>University<br>Of<br>Washington  | Bolivar     | MO    | United States | Site Investigator |
| Michael  | Schrift      | DO | -<br>Harborview<br>Medical<br>Center<br>University<br>of Texas  | Seattle     | WA    | United States | Site Investigator |
| Paul     | Schulz       | MD | Health<br>Science<br>Center<br>Infinity<br>Clinical<br>Research | Houston     | TX    | United States | Site Investigator |
| Harvey   | Schwartz     | MD |                                                                 | Hollywood   | FL    | United States | Site Investigator |
| Julie    | Schwartzbard | MD |                                                                 | Aventura    | FL    | United States | Site Investigator |
| John     | Scott        | MD | National<br>Clinical<br>Research                                | Richmond    | VA    | United States | Site Investigator |

|          |          |                   |                                                  |              |    |               |                   |
|----------|----------|-------------------|--------------------------------------------------|--------------|----|---------------|-------------------|
| Lissette | Selem    | MD (2022-Present) | Ezy Medical Research                             | Miami        | FL | United States | Site Investigator |
| Pramod   | Sethi    | MD                | Guilford Neurologic Research                     | Greensboro   | NC | United States | Site Investigator |
| Sharon   | Sha      | MD                | Stanford Neuroscience Health Center              | Palo Alto    | CA | United States | Site Investigator |
| Kenneth  | Sharlin  | MD                | Sharlin Health Neuroscience Research Center      | Ozark        | MO | United States | Site Investigator |
| Sanjiv   | Sharma   | MD                | Advanced Memory Research Institute of New Jersey | Toms River   | NJ | United States | Site Investigator |
| Thomas   | Shiovitz | MD                | California Neuroscience Research Medical Group   | Sherman Oaks | CA | United States | Site Investigator |
| Rajinder | Shiwach  | MD                | Insite Clinical Research Llc                     | Desoto       | TX | United States | Site Investigator |

|         |         |     |                                                 |            |    |                |                        |
|---------|---------|-----|-------------------------------------------------|------------|----|----------------|------------------------|
| Martin  | Sladek  | MD  | Clintrial<br>s.r.o.Pocern<br>icka<br>Research   | Praha      |    | Czech Republic | Site Investigator      |
| Bart    | Sloan   | MD  | Center For<br>Clinical<br>Studies<br>USF Health | Norwalk    | CT | United States  | Site Investigator      |
| Amanda  | Smith   | MD  | Byrd<br>Alzheimer's<br>Institute<br>Boston      | Tampa      | FL | United States  | Site Investigator      |
| Paul    | Solomon | PhD | Center For<br>Memory<br>NECCR                   | Newton     | MA | United States  | Principal Investigator |
| Ehab    | Sorial  | MD  | Primacare<br>Research                           | Fall River | MA | United States  | Site Investigator      |
| Evelio  | Sosa    | MD  | Indago<br>Research<br>And Health<br>Center Inc  | Hialeah    | FL | United States  | Site Investigator      |
| Mary    | Stedman | MD  | Stedman<br>Clinical<br>Trials<br>Axiom          | Tampa      | FL | United States  | Site Investigator      |
| Susan   | Steen   | MD  | Clinical<br>Research of<br>Florida              | Tampa      | FL | United States  | Site Investigator      |
| Lee     | Stein   | MD  | Neurology<br>Clinic<br>Boston                   | Cordova    | TN | United States  | Site Investigator      |
| Arkadiy | Stolyar | MD  | Clinical<br>Trials                              | Boston     | MA | United States  | Site Investigator      |

|           |           |                |                                                        |                 |       |               |                   |
|-----------|-----------|----------------|--------------------------------------------------------|-----------------|-------|---------------|-------------------|
| John      | Stoukides | MD             | Rhode Island Mood & Memory Research Institute          | East Providence | RI    | United States | Site Investigator |
| Shinji    | Sudoh     | MD             | National Hospital Organization Utano National Hospital | Kyoto           | KYOTO | Japan         | Site Investigator |
| James     | Sutton    | MD (2020-2022) | Adams Clinical                                         | Watertown       | MA    | United States | Site Investigator |
| Junaid    | Syed      | MD             | Arch Clinical Trials                                   | St. Louis       | MO    | United States | Site Investigator |
| Kinga     | Szigeti   | MD, PhD        | University of Buffalo                                  | Buffalo         | NY    | United States | Site Investigator |
| Hisatsugu | Tachibana | MD             | Takatsuki General Hospital Medical Corporation         | Takatsuki       | OSAKA | Japan         | Site Investigator |
| Yuichi    | Takahashi | MD (2022-2023) | Chiseikai Tokyo Center Clinic                          | Chuo-ku         | TOKYO | Japan         | Site Investigator |
| Amane     | Tateno    | MD, PhD        | Nippon Medical School Hospital                         | Tokyo           | TOKYO | Japan         | Site Investigator |

|            |                   |                              |                                                         |               |           |               |                   |
|------------|-------------------|------------------------------|---------------------------------------------------------|---------------|-----------|---------------|-------------------|
| James Dale | Taylor            | PharmD<br>(2022-<br>current) | Synexus<br>Clinical<br>Research US                      | Orlando       | FL        | United States | Site Investigator |
| Kelly      | Taylor            | MD                           | Sensible<br>Healthcare<br>CHS-                          | Ocoee         | FL        | United States | Site Investigator |
| Oleg       | Tcheremis<br>sine | MD                           | behavioral<br>Health<br>Research<br>Medical<br>Research | Charlotte     | NC        | United States | Site Investigator |
| Adly       | Thebaud           | MD                           | Group Of<br>Central<br>Florida<br>Pacific               | Orange City   | FL        | United States | Site Investigator |
| Stephen    | Thein             | PhD                          | Research<br>Network<br>IPS                              | San Diego     | CA        | United States | Site Investigator |
| Louise     | Thurman           | MD                           | Research<br>Company                                     | Oklahoma City | OK        | United States | Site Investigator |
| Steven     | Toenjes           | MD                           | Jacksonville<br>Center For<br>Clinical<br>Research      | Jacksonville  | FL        | United States | Site Investigator |
| Hiromasa   | Toji              | MD                           | Hiroshima<br>Neurology<br>Clinic                        | Hiroshima     | HIROSHIMA | Japan         | Site Investigator |

|          |            |                   |                                                                                                        |              |       |               |                   |
|----------|------------|-------------------|--------------------------------------------------------------------------------------------------------|--------------|-------|---------------|-------------------|
| Misaki   | Toma       | MD (2023-current) | Medical Corporation<br>Chiseikai<br>Tokyo<br>Center<br>Clinic<br>Neurology<br>Consultants<br>Of Dallas | Chuo-ku      | TOKYO | Japan         | Site Investigator |
| Duc      | Tran       | MD                | Future Care<br>Solution                                                                                | Dallas       | TX    | United States | Site Investigator |
| Pilar    | Trueba     | MD                | National<br>Center For<br>Geriatrics<br>And<br>Gerontolog<br>y                                         | Miami        | FL    | United States | Site Investigator |
| Masashi  | Tsujimoto  | MD                | Georgetow<br>n University<br>Medical<br>Center                                                         | Obu City     | AICHI | Japan         | Site Investigator |
| Raymond  | Turner     | MD, PhD           | Tokyo Asbo<br>Clinic                                                                                   | Washington   | DC    | United States | Site Investigator |
| Akiyoshi | Uchiyama   | MD                | Centrum<br>Medyczne<br>SeniorUl.<br>University<br>of<br>Pennsylvani<br>a Health<br>System              | Chuo-ku      | TOKYO | Japan         | Site Investigator |
| Dorota   | Ussorowska | MD                |                                                                                                        | Sopot        |       | Poland        | Site Investigator |
| Sanjeev  | Vaishnavi  | MD, PhD           |                                                                                                        | Philadelphia | PA    | United States | Site Investigator |

|         |                   |                   |                                           |                  |    |                |                   |
|---------|-------------------|-------------------|-------------------------------------------|------------------|----|----------------|-------------------|
| Elena   | Valor             | MD                | Florida International Research Center     | Miami            | FL | United States  | Site Investigator |
| Joel    | Vandersluis       | MD                | Neurology Diagnostics                     | Dayton           | OH | United States  | Site Investigator |
| Alberto | Vasquez           | MD                | Suncoast Neuroscience Associates          | St. Petersburg   | FL | United States  | Site Investigator |
| Juan    | Velez             | MD (2022-current) | Tilda Research - Hq                       | Tustin           | CA | United States  | Site Investigator |
| Cherian | Verghese          | MD                | Keystone Clinical Studies                 | Plymouth Meeting | PA | United States  | Site Investigator |
| Klaudia | Vodickova-borzova | MD                | Brain-soul Therapy                        | Kladno           |    | Czech Republic | Site Investigator |
| David   | Watson            | PsD               | Alzheimer's Research And Treatment Center | Wellington       | FL | United States  | Site Investigator |
| David   | Watson            | MD                | Alzheimer's Research And Treatment Center | Stuart           | FL | United States  | Site Investigator |
| David   | Weidman           | MD                | Banner Alzheimer Institute                | Phoenix          | AZ | United States  | Site Investigator |



|           |            |         |                                                                                 |                    |                  |               |                   |
|-----------|------------|---------|---------------------------------------------------------------------------------|--------------------|------------------|---------------|-------------------|
| David     | Weisman    | MD      | Abington<br>Neurologica<br>I Associates                                         | Abington           | PA               | United States | Site Investigator |
| Alexander | White      | MD      | Progressive<br>Medical<br>Research                                              | Port Orange        | FL               | United States | Site Investigator |
| Katherine | Willingham | MD      | Cotton<br>O'Neil Clinic                                                         | Topeka             | KS               | United States | Site Investigator |
| Izabela   | Winkel     | MD, PhD | Osrodek<br>Badawczo-<br>naukowo<br>Dydaktyczn<br>y Chorob<br>Otepiennyc<br>hUI. | Scinawa            | LOWER<br>SILESIA | Poland        | Site Investigator |
| Paul      | Winner     | MD      | Premiere<br>Research<br>Institute At<br>Palm Beach<br>Neurology                 | West Palm<br>Beach | FL               | United States | Site Investigator |
| Jaron     | Winston    | MD      | Senior<br>Adults<br>Specialty<br>Research                                       | Austin             | TX               | United States | Site Investigator |
| Adam      | Wolff      | MD      | Colorado<br>Neurologica<br>I Research<br>Center                                 | Denver             | CO               | United States | Site Investigator |

|          |           |                       |                                                        |          |                  |               |                   |
|----------|-----------|-----------------------|--------------------------------------------------------|----------|------------------|---------------|-------------------|
| Hideo    | Yagi      | MD                    | Koseikai<br>Takeda<br>Hospital                         | Kyoto    | KYOTO            | Japan         | Site Investigator |
| Hideki   | Yamamoto  | MD                    | Honmachi<br>Clinic                                     | Ikeda    | OSAKA            | Japan         | Site Investigator |
| Sanjay   | Yathiraj  | MD (2022-<br>current) | Roskamp<br>Institute<br>Clinical<br>Trials<br>Division | Sarasota | FL               | United States | Site Investigator |
| Yasumasa | Yoshiyama | MD                    | Inage<br>Neurology<br>And<br>Memory<br>Clinic          | Inage    | CHIBA-KEN        | Japan         | Site Investigator |
| Marzena  | Zboch     | MD, PhD               | Wroclawski<br>Centrum<br>Alzheimero<br>wskieAl.gen     | Wroclaw  | DOLNOŚLĄ<br>SKIE | Poland        | Site Investigator |

Group (if more than 1  
Group listed in the  
byline) and/or  
Subgroup (eg,  
Steering Committee)
